# Supplementary material for: Nanobodies targeting conserved epitopes on the major outer membrane protein of Campylobacter as potential tools for control of Campylobacter colonization
Source: PubMed Central journal article supplement (PMC5721652; doi:10.1186/s13567-017-0491-9), 2017-12-08
Supplement: 13567_2017_491_MOESM1_ESM.pdf [file 13567_2017_491_MOESM1_ESM.pdf]

**Results of the ELISA performed to measure the binding of anti-*Campylobacter* nanobodies to different *Campylobacter* isolates.**

|           | Nb5 | Nb22 | Nb23 | Nb24 | Nb49 | Nb84 | Nb15 | Nb32 | Nb34 | Nb45 | Nb48 | Nb63 |
|-----------|-----|------|------|------|------|------|------|------|------|------|------|------|
| KC40      | ++  | ++   | ++   | ++   | ++   | ++   | ++   | +    | ++   | ++   | ++   | ++   |
| 7P-6.12   | ++  | +    | +    | +    | +    | ++   | +    | -    | -    | +    | +    | +    |
| 10C-6.1   | ++  | +    | +    | ++   | +    | ++   | +    | -    | -    | +    | +    | +    |
| 10KF-1.16 | ++  | ++   | ++   | ++   | ++   | ++   | ++   | +    | +    | ++   | ++   | ++   |
| 10KF-4.12 | ++  | +    | +    | +    | +    | ++   | -    | -    | -    | -    | +    | +    |
| 10VTDD-8  | ++  | +    | +    | ++   | +    | ++   | +    | -    | -    | +    | +    | +    |
| KC59.1    | ++  | ++   | ++   | ++   | ++   | ++   | ++   | ++   | +    | ++   | ++   | ++   |
| KC64.1    | ++  | +    | +    | ++   | +    | ++   | +    | -    | -    | +    | +    | +    |
| KC67.2    | ++  | +    | +    | +    | +    | ++   | +    | -    | -    | +    | +    | +    |
| KC84.2    | +   | +    | +    | ++   | +    | ++   | +    | -    | -    | +    | +    | +    |
| KC96.1    | ++  | ++   | ++   | ++   | +    | ++   | +    | +    | -    | ++   | +    | +    |
| KC101     | ++  | ++   | ++   | ++   | ++   | ++   | +    | +    | +    | ++   | +    | +    |

  

|            | Nb5 | Nb22 | Nb23 | Nb24 | Nb49 | Nb84 |
|------------|-----|------|------|------|------|------|
| Cam12/0214 | ++  | ++   | +    | +    | +    | +    |
| Cam12/0231 | ++  | +    | +    | ++   | +    | +    |
| Cam12/0146 | +   | +    | +    | +    | +    | +    |
| Cam12/0152 | +   | +    | +    | +    | +    | +    |
| Cam12/0173 | +   | +    | +    | +    | +    | +    |
| Cam12/0197 | ++  | +    | +    | +    | +    | +    |
| Cam12/0156 | ++  | ++   | ++   | ++   | ++   | ++   |
| Cam12/0190 | +   | +    | +    | +    | +    | +    |
| Cam12/0202 | ++  | ++   | ++   | ++   | ++   | ++   |
| Cam12/0222 | +   | +    | +    | +    | +    | +    |
| Cam12/0183 | +   | +    | +    | +    | +    | +    |

  

|        | Nb5 | Nb22 | Nb23 | Nb24 | Nb49 | Nb84 |
|--------|-----|------|------|------|------|------|
| 52/P   | ++  | +    | ++   | +    | +    | +    |
| 70/P   | ++  | ++   | ++   | ++   | ++   | ++   |
| K43/5  | +   | +    | +    | +    | +    | +    |
| KC7    | ++  | ++   | ++   | ++   | ++   | ++   |
| MB3361 | +   | +    | +    | +    | +    | +    |

(++) Values higher than two times the cut-off (Grey). (+) Values higher than the cut-off. (-)

Values lower than the cut-off (Red). To calculate the cut-off, the following equation was used:

cut-off =  $\bar{x}_{neg} + (3\sigma_{neg})$ . In this equation  $\bar{x}_{neg}$  is the mean and  $\sigma_{neg}$  the standard deviation of the negative control. As a negative control, the ELISA was performed in the absence of anti-*Campylobacter* nanobodies.

## Results of the ELISA performed to measure the binding of anti-*Campylobacter* nanobodies to different *Campylobacter* isolates.

|            | Nb5           | Nb22          | Nb23          | Nb24          | Nb49          | Nb84          | Nb15          | Nb32          | Nb34          | Nb45          | Nb48          | Nb63          |
|------------|---------------|---------------|---------------|---------------|---------------|---------------|---------------|---------------|---------------|---------------|---------------|---------------|
| KC40       | 1.055 ± 0.039 | 0.980 ± 0.007 | 0.871 ± 0.050 | 0.932 ± 0.028 | 0.764 ± 0.226 | 0.948 ± 0.034 | 0.827 ± 0.054 | 0.280 ± 0.007 | 1.218 ± 0.215 | 0.969 ± 0.146 | 0.895 ± 0.094 | 0.664 ± 0.017 |
| 7P-6.12    | 0.675 ± 0.117 | 0.435 ± 0.012 | 0.390 ± 0.053 | 0.401 ± 0.044 | 0.438 ± 0.022 | 0.628 ± 0.035 | 0.402 ± 0.050 | 0.212 ± 0.012 | 0.239 ± 0.029 | 0.341 ± 0.031 | 0.398 ± 0.039 | 0.347 ± 0.007 |
| 10C-6.1    | 0.753 ± 0.044 | 0.455 ± 0.034 | 0.425 ± 0.007 | 0.549 ± 0.022 | 0.380 ± 0.034 | 0.651 ± 0.123 | 0.407 ± 0.046 | 0.222 ± 0.006 | 0.232 ± 0.024 | 0.424 ± 0.027 | 0.447 ± 0.005 | 0.372 ± 0.033 |
| 10KF-1.16  | 0.856 ± 0.038 | 0.736 ± 0.034 | 0.750 ± 0.016 | 0.755 ± 0.004 | 0.682 ± 0.082 | 0.912 ± 0.006 | 0.663 ± 0.020 | 0.362 ± 0.114 | 0.362 ± 0.029 | 0.704 ± 0.029 | 0.724 ± 0.019 | 0.584 ± 0.039 |
| 10KF-4.12  | 0.643 ± 0.109 | 0.427 ± 0.076 | 0.371 ± 0.069 | 0.445 ± 0.078 | 0.388 ± 0.138 | 0.674 ± 0.002 | 0.239 ± 0.052 | 0.217 ± 0.036 | 0.206 ± 0.007 | 0.191 ± 0.075 | 0.364 ± 0.040 | 0.339 ± 0.009 |
| 10VTDD-8   | 0.805 ± 0.047 | 0.458 ± 0.017 | 0.406 ± 0.121 | 0.618 ± 0.043 | 0.449 ± 0.022 | 0.846 ± 0.016 | 0.361 ± 0.182 | 0.231 ± 0.023 | 0.181 ± 0.037 | 0.440 ± 0.055 | 0.432 ± 0.033 | 0.473 ± 0.048 |
| KC59.1     | 1.076 ± 0.142 | 1.049 ± 0.120 | 1.029 ± 0.092 | 1.019 ± 0.072 | 0.830 ± 0.175 | 1.165 ± 0.098 | 0.929 ± 0.051 | 0.835 ± 0.032 | 0.296 ± 0.097 | 0.976 ± 0.029 | 0.950 ± 0.001 | 0.744 ± 0.031 |
| KC64.1     | 0.878 ± 0.133 | 0.470 ± 0.033 | 0.445 ± 0.058 | 0.605 ± 0.036 | 0.433 ± 0.037 | 0.729 ± 0.047 | 0.411 ± 0.012 | 0.234 ± 0.014 | 0.206 ± 0.004 | 0.437 ± 0.009 | 0.416 ± 0.016 | 0.371 ± 0.015 |
| KC67.2     | 0.783 ± 0.112 | 0.471 ± 0.007 | 0.415 ± 0.059 | 0.399 ± 0.018 | 0.451 ± 0.087 | 0.735 ± 0.022 | 0.372 ± 0.007 | 0.243 ± 0.044 | 0.220 ± 0.015 | 0.440 ± 0.010 | 0.437 ± 0.038 | 0.374 ± 0.034 |
| KC84.2     | 0.426 ± 0.100 | 0.456 ± 0.002 | 0.402 ± 0.001 | 0.621 ± 0.068 | 0.445 ± 0.017 | 0.620 ± 0.010 | 0.338 ± 0.002 | 0.230 ± 0.024 | 0.219 ± 0.010 | 0.428 ± 0.010 | 0.382 ± 0.029 | 0.376 ± 0.038 |
| KC96.1     | 0.913 ± 0.065 | 0.725 ± 0.005 | 0.572 ± 0.014 | 0.717 ± 0.048 | 0.486 ± 0.003 | 0.757 ± 0.065 | 0.471 ± 0.055 | 0.342 ± 0.084 | 0.190 ± 0.052 | 0.557 ± 0.016 | 0.424 ± 0.043 | 0.440 ± 0.032 |
| KC101      | 0.963 ± 0.053 | 0.797 ± 0.024 | 0.645 ± 0.008 | 0.668 ± 0.031 | 0.604 ± 0.013 | 0.769 ± 0.063 | 0.456 ± 0.046 | 0.393 ± 0.130 | 0.288 ± 0.013 | 0.483 ± 0.117 | 0.434 ± 0.041 | 0.451 ± 0.044 |
|            | Nb5           | Nb22          | Nb23          | Nb24          | Nb49          | Nb84          |               |               |               |               |               |               |
| Cam12/0214 | 0.435 ± 0.066 | 0.432 ± 0.080 | 0.369 ± 0.035 | 0.378 ± 0.044 | 0.358 ± 0.042 | 0.368 ± 0.025 |               |               |               |               |               |               |
| Cam12/0231 | 0.478 ± 0.085 | 0.370 ± 0.078 | 0.361 ± 0.028 | 0.498 ± 0.086 | 0.356 ± 0.042 | 0.358 ± 0.026 |               |               |               |               |               |               |
| Cam12/0146 | 0.339 ± 0.088 | 0.376 ± 0.118 | 0.324 ± 0.055 | 0.342 ± 0.050 | 0.356 ± 0.051 | 0.354 ± 0.049 |               |               |               |               |               |               |
| Cam12/0152 | 0.401 ± 0.165 | 0.338 ± 0.072 | 0.301 ± 0.026 | 0.349 ± 0.044 | 0.355 ± 0.054 | 0.348 ± 0.050 |               |               |               |               |               |               |
| Cam12/0173 | 0.325 ± 0.064 | 0.350 ± 0.044 | 0.389 ± 0.148 | 0.346 ± 0.036 | 0.358 ± 0.053 | 0.320 ± 0.043 |               |               |               |               |               |               |
| Cam12/0197 | 0.434 ± 0.085 | 0.361 ± 0.027 | 0.371 ± 0.033 | 0.383 ± 0.032 | 0.364 ± 0.024 | 0.359 ± 0.037 |               |               |               |               |               |               |
| Cam12/0156 | 0.448 ± 0.247 | 0.448 ± 0.231 | 0.486 ± 0.247 | 0.459 ± 0.282 | 0.490 ± 0.176 | 0.463 ± 0.288 |               |               |               |               |               |               |
| Cam12/0190 | 0.342 ± 0.044 | 0.351 ± 0.091 | 0.330 ± 0.067 | 0.365 ± 0.067 | 0.329 ± 0.057 | 0.317 ± 0.052 |               |               |               |               |               |               |
| Cam12/0202 | 0.831 ± 0.245 | 0.851 ± 0.306 | 0.823 ± 0.281 | 0.902 ± 0.297 | 0.762 ± 0.255 | 0.869 ± 0.330 |               |               |               |               |               |               |
| Cam12/0222 | 0.359 ± 0.027 | 0.363 ± 0.047 | 0.357 ± 0.040 | 0.385 ± 0.022 | 0.355 ± 0.034 | 0.363 ± 0.021 |               |               |               |               |               |               |
| Cam12/0183 | 0.345 ± 0.097 | 0.344 ± 0.084 | 0.362 ± 0.086 | 0.390 ± 0.075 | 0.352 ± 0.073 | 0.344 ± 0.098 |               |               |               |               |               |               |
|            | Nb5           | Nb22          | Nb23          | Nb24          | Nb49          | Nb84          |               |               |               |               |               |               |
| 52/P       | 0.942 ± 0.041 | 0.401 ± 0.016 | 0.911 ± 0.033 | 0.440 ± 0.049 | 0.387 ± 0.048 | 0.386 ± 0.008 |               |               |               |               |               |               |
| 70/P       | 0.776 ± 0.089 | 0.717 ± 0.064 | 0.922 ± 0.165 | 0.838 ± 0.113 | 0.757 ± 0.136 | 0.800 ± 0.021 |               |               |               |               |               |               |
| K43/5      | 0.324 ± 0.024 | 0.322 ± 0.029 | 0.276 ± 0.004 | 0.433 ± 0.058 | 0.294 ± 0.079 | 0.320 ± 0.036 |               |               |               |               |               |               |
| KC7        | 2.057 ± 0.238 | 2.048 ± 0.131 | 2.063 ± 0.030 | 1.944 ± 0.036 | 2.388 ± 0.033 | 2.389 ± 0.014 |               |               |               |               |               |               |
| MB3360     | 0.426 ± 0.059 | 0.423 ± 0.034 | 0.459 ± 0.045 | 0.426 ± 0.052 | 0.384 ± 0.013 | 0.420 ± 0.025 |               |               |               |               |               |               |

Mean ± standard deviation
