# Supplementary material for: Nanobodies targeting conserved epitopes on the major outer membrane protein of Campylobacter as potential tools for control of Campylobacter colonization
Source: PubMed Central journal article supplement (PMC5721652; doi:10.1186/s13567-017-0491-9), 2017-12-08
Supplement: 13567_2017_491_MOESM6_ESM.pdf [file 13567_2017_491_MOESM6_ESM.pdf]

KC40 idgltlaafavdsfmaaeggadllghsn-----issdkp---stapfk-----ldsignlyggaa  
7P-6.12 idgltlaafavdsfmaaeggallghsn-----istts---nqarfk-----vdslnlygaaa  
10C-6.1 idgltlaafaadsfmaaeggadllghsn-----tstatp---nqapfk-----vdsvgnlygaaa  
10KF-1.16 idgltlaafavdsfmaaeggsdlvgang-----safk-----vdsignlygaaa  
10KF-4.12 idgltlaafamdsfneasdtvtitqdnnqkitgvqfnrgnpgkdsdvsga-----ldwskniygaaa  
10-VTDD8 idgltlaafavdsfmaaeggallghsn-----istts---nqapfk-----vdsvgnlygaaa  
KC59.1 idgltlaafavdsfmaaeggadllgqst-----isttq---naapfk-----vdsvgnlygaaa  
KC64.1 idgltlaafamdsfneasdtvti--tq-----dsnqki---tgqfnrgnpgkdvsgaldwskniygaaa  
KC67.2 idgltlaafavdsfmaaeggadllghsn-----tstatp---nqvpfk-----vdsvgnlygaaa  
KC84.2 idgltlaafamdsfneasdtvtitqdn-----sqki---tgqfnrgnpgkdsdvsgaldwskniygata  
KC96.1 idgltlaafavdsfmaaeggadllghsn-----istts---nqapfk-----vdsvgnlygaaa  
KC101 idgltlaafavdsfmaaeggadllghst-----tsttq---kaapfk-----vdsvgnlygaaa

Cam12/0214 idgltlaafavdsfmaaeggadllghsn-----istt-p---nqapfk-----vdsvgnlygaaa  
Cam12/0231 idgltlaafavdsfmaaeggallgrsn-----istts---nqapfk-----advgnlygaaa  
Cam12/0146 idgltlaafavdsfmaaeggadllghsn-----istt-p---nqapfk-----vdsvgnlygaaa  
Cam12/0152 idgltlaafaadsfmaaeggadllghsn-----istts---nqapfk-----vdsvgnlygaaa  
Cam12/0173 idgltlaafamdsfneasdtvtitqdnnqkitgvqfnrgnpgkdsdvsga-----ldwskniygaaa  
Cam12/0197 idgltlaafavdsfmaaeggadllghst-----tsttq---kaapfk-----vdsvgnlygaaa  
Cam12/0156 idgltlaafavdsfmaaeggsdlvgang-----safk-----vdsignlygaaa  
Cam12/0190 idgltlaafaadsfmaaeggadllghsn-----istts---nqapfk-----vdsvgnlygaaa  
Cam12/0202 idgltlaafavdsfmaaeggadllghst-----tsttq---kaapfk-----vdsvgnlygaaa  
Cam12/0222 idgltlaafaadsfmaaeggadllghsn-----istttp---nqapfk-----vdsvgnlygaaa  
Cam12/0183 idgltlaafavdsfmaaeggallghsn-----iptts---nqapfk-----vdsvgnlygaaa

52/P idgltlaafavdsynsdeqggdlgtvln-----fne-----nlygaaa  
70/P idgltlaafavdsynsdeqggdlgtvln-----fne-----nlygaaa  
K43/5 idgltlaafavdsynsdeqigdlgkvlN-----fne-----nlygaaa  
KC7 idgltlaafavdsynsdeqggdlgtvln-----fne-----nlygaaa  
MB3361 idgltlaafaidsvntdeqgdgvffkng-----nlt dag---dnspy-----ldwsgniygaaa

$\beta 7$

L4

$\beta 8$

KC40 vgsyeflgqqfnpqlwlaywdqvaffiyavdaaysttifdginwtlegaylgnslseldd--k---tht-ngnlf  
7P-6.12 vgsydlaggqqfnpqlwlaywdqvaffiyavdaaysttifdginwtlegaylgnslseldd--t---tht-ngnffa  
10C-6.1 vgsydlaggqqfnpqlwlaywdqvaffiyavdaaysttifdginwtlegaylgnslseldd--t---tha-ngnlf  
10KF-1.16 vgsydlaggqqfnpqlwlaywdqvaffiyaldasysttifdginwtlegaylgnslseld--d--k---tya-ngnlf  
10KF-4.12 igstydiaggqqfnpqlwlaymsdnaflyaldaaysttifdginwtlegaylgnsvdnklkd--r---ldaangnffa  
10-VTDD8 vgsydlaggqqfnpqlwlaywdqvaffiyavdaaysttifdginwtlegaylgnslseldd--k---tha-ngnlf  
KC59.1 vgsydlaggqqfnpqlwlaywdqvaffiyavdaaysttifdginwtlegaylgnslseldd--k---tha-ngnlf  
KC64.1 igstydiaggqqfnpqlwlaymsdnaflyaldaaysttifdginwtlegaylgnsvdnklkd--r---lgvangnffa  
KC67.2 vgsydlaggqqfnpqlwlaywdqvaffiyavdaaysttifdginwtlegaylgnslseldd--t---tha-ngnlf  
KC84.2 igstydiaggqqfnpqlwlaymsdnaflyaldatysttifdginwtlegaylgnsvdnklkd--r---ldaangnffa  
KC96.1 vgsydlaggqqfnpqlwlaywdqvaffiyavdaaysttifdginwtlegaylgnslseldd--k---tha-ngnlf  
KC101 vgsydlaggqqfnpqlwlaywdqvaffiyavdaaysttifdginwtlegaylgnslseldd--k---tha-ngnlf

Cam12/0214 vgsydlaggqqfnpqlwlaywdqvaffiyavdaaysttifdginwtlegaylgnslseldd--k---tha-ngnlf  
Cam12/0231 vgsydlaggqqfnpqlwlaywdqvaffiyavdaaysttifdginwtlegaylgnslseldd--t---tht-ngnffa  
Cam12/0146 vgsydlaggqqfnpqlwlaywdqvaffiyavdaaysttifdginwtlegaylgnslseldd--k---tha-ngnlf  
Cam12/0152 vgsydlaggqqfnpqlwlaywdqvaffiyavdaaysttifdginwtlegaylgnslseldd--k---tha-ngnlf  
Cam12/0173 igstydiaggqqfnpqlwlaymsdnaflyaldaaysttifdginwtlegaylgnsvdnklkd--r---ldaangnffa  
Cam12/0197 vgsydlaggqqfnpqlwlaywdqvaffiyavdaaysttifdginwtlegaylgnslseldd--k---tha-ngnlf  
Cam12/0156 vgsydlaggqqfnpqlwlaywdqvaffiyaldasysttifdginwtlegaylgnslseld--d--k---tya-ngnlf  
Cam12/0190 vgsydlaggqqfnpqlwlaywdqvaffiyavdaaysttifdginwtlegaylgnslseldd--k---tha-ngnlf  
Cam12/0202 vgsydlaggqqfnpqlwlaywdqvaffiyavdaaysttifdginwtlegaylgnslseldd--k---tha-ngnlf  
Cam12/0222 vgsydlaggqqfnpqlwlaywdqvaffiyavdaaysttifdginwtlegaylgnslseldd--k---tha-ngnlf  
Cam12/0183 vgsydlaggqqfnpqlwlaywdqvaffiyavdaaysttifdginwtlegaylgnslseldd--k---tha-ngnlf

52/P igsyevfngqlnpqlwlaymtdnaffiyavdaaynttifdgvnwtlegaylgnslseld--l---gng-ngnffa  
70/P igsyevfngqlnpqlwlaymtdnaffiyavdaaynttifdgvnwtlegaylgnslseld--l---gng-ngnffa  
K43/5 igsyevfngqlnpqlwlaymtdnaffiyavdaaynttifdgvnwtlegaylgnslseld--l---gng-ngnffa  
KC7 igsyevfngqlnpqlwlaymtdnaffiyavdaaynttifdgvnwtlegaylgnslseld--l---gng-ngnffa  
MB3361 igsyevfngqlnpqlwlaymtdnaflyaldvaynttifdgvnwtlegaylgnslseldl--l---yyagrsa-ngnffa

$\beta 9$

$\beta 10$

$\beta 11$

L5

KC40 lrgsvelngwdaslgglyygdkekastvvi edqgnlgsllagee ifyttgsrlngdtgrnifgyvtggytfn etvr  
7P-6.12 lkggievngwdaslgglyygdkekastvvi edqgnlssllagee ifyttgsrlngdtgrnifgyvtggytfn etvr  
10C-6.1 lkgsievngwdaslgglyygdkekastvvi edqgnlgsllagee ifyttgsrlngdtgrnifgyvtggytfn etvr  
10KF-1.16 lkgsievngwdaslgglyygdkekastvvi edqgnlgsllagee ifyttgsrlngdtgrnifgyvtggytfn etvr  
10KF-4.12 lrgtvevngwdaslgglyygdkekastvvi edqgnlgsllagee ifytnsgnlngdigrnifgyvtagytfn etvr  
10-VTDD8 lkgsievngwdaslgglyygdkekastvvi edqgnlgsllagee ifyttgsrlngdtgrnifgyvtggytfn etvr  
KC59.1 lkgsievngwdaslgglyygdkekastvvi edqgnlgsllagee ifyttgsrlngdtgrnifgyvtggytfn etvr  
KC64.1 lrgtvevngwdaslgglyygdkekastvvi edqgnlgsllagee ifytrgsnlngdlgrnifgyvtggytfn etvr  
KC67.2 lkgsievngwdaslgglyygdkekastvvi edqgnlgsllagee ifyttgsrlngdtgrnifgyvtggytfn etvr  
KC84.2 lrgtvevngwdaslgglyygdkekastvvi edqgnlgsllagee ifytrgsnlngdlgrnifgyvtggytfn etvr  
KC96.1 lkgsievngwdaslgglyygdkekastvvi edqgnlgsllagee ifyttgsrlngdtgrnifgyvtggytfn etvr  
KC101 lkgsievngwdaslgglyygdkekastvvi edqgnlgsllagee ifyttgsrlngdtgrnifgyvtggytfn etvr

Cam12/0214 lkgsievngwdaslgglyygdkekastvvi edqgnlgsllagee ifyttgsrlngdtgrnifgyvtggytfn etvr  
Cam12/0231 lkggievngwdaslgglyygdkekastvvi edqgnlgsllagee ifyttgsrlngdtgrnifgyvtggytfn etvr  
Cam12/0146 lkgsievngwdaslgglyygdkekastvvi edqgnlgsllagee ifyttgsrlngdtgrnifgyvtggytfn etvr  
Cam12/0152 lkgsievngwdaslgglyygdkekastvvi edqgnlgsllagee ifyttgsrlngdtgrnifgyvtggytfn etvr  
Cam12/0173 lrgtvevngwdaslgglyygdkekastvvi edqgnlgsllagee ifytnsgnlngdigrnifgyvtagytfn etvr  
Cam12/0197 lkgsievngwdaslgglyygdkekastvvi edqgnlgsllagee ifyttgsrlngdtgrnifgyvtggytfn etvr  
Cam12/0156 lkgsievngwdaslgglyygdkekastvvi edqgnlgsllagee ifyttgsrlngdtgrnifgyvtggytfn etvr  
Cam12/0190 lkgsievngwdaslgglyygdkekastvvi edqgnlgsllagee ifyttgsrlngdtgrnifgyvtggytfn etvr  
Cam12/0202 lkgsievngwdaslgglyygdkekastvvi edqgnlgsllagee ifyttgsrlngdtgrnifgyvtggytfn etvr  
Cam12/0222 lkgsievngwdaslgglyygdkekastvvi edqgnlgsllagee ifyttgsrlngdtgrnifgyvtggytfn etvr  
Cam12/0183 lkgsievngwdaslgglyygdkekastvvi edqgnlgsllagee ifyttgsrlngdtgrnifgyvtggytfn etvr

52/P lngsievngwdatl gglyygdkekastvvi edqgnlgsllagee ifytnsgklngdtgrnifgfvkagytfn etvr  
70/P lngsievngwdatl gglyygdkekastvvi edqgnlgsllagee ifytnsgklngdtgrnifgfvkagytfn etvr  
K43/5 lngsievngwdatl gglyygdkekastvvi edqgnlgsllagee ifytnsgklngdtgrnifgfvkagytfn etvr  
KC7 lngsievngwdatl gglyygdkekastvvi edqgnlgsllagee ifytnsgklngdtgrnifgfvkagytfn etvr  
MB3361 lrgsvevngwdatl ggllyygdkekastvvi edqgnlgsllagee ifytnsgklngdtgrnifgyvka gytfn etvr  
β12 β13 L6 β14

KC40 v g a d f v y g g t k t e t a g - h l g g g k k l e a v a r v d y k y s p k l n f s a f y s y v n l d  
7P-6.12 v g a d f v y g g t k t e a a n - h l g g g k k l e a v a r v d y k y s p k l n f s a f y s y v n l a  
10C-6.1 v g a d f v y g g t k t e a a s - h l g g g k k l e a v a r v d y k y s p k l n f s a f y s y v n l d  
10KF-1.16 v g a d f v y g g t k t e a a n - h l g g g k k l e a v a r v d y k y s p k l n f s a f y s y v n l d  
10KF-4.12 v g a d f v y g g t k t n i i g - q - - g g k k l e a v a r v d y k y s p k l n f s a f y s y v n v d  
10-VTDD8 v g a d f v y g g t k t e a a s - h l g g g k k l e a v a r v d y k y s p k l n f s a f y s y v n l d  
KC59.1 v g a d f v y g g t k t e a a n - h l g g g k k l e a v a r v d y k y s p k l n f s a f y s y v n l d  
KC64.1 v g a d f v y g g t k t n i i g - q - - g g k k l e a v a r v d y k y s p k l n f s a f y s y v n v d  
KC67.2 v g a d f v y g g t k t e a a n - h l g g g k k l e a v a r v d y k y s p k l n f s a f y s y v n l d  
KC84.2 v g a d f v y g g t k t n i i g - q - - g g k k l e a v a r v d y k y s p k l n f s a f y s y v n v d  
KC96.1 v g a d f v y g g t k t e a a n - h l g g g k k l e a v a r v d y k y s p k l n f s a f y s y v n l d  
KC101 v g a d f v y g g t k t e a a n - h l g g g k k l e a v a r v d y k y s p k l n f s a f y s y v n l d

Cam12/0214 v g a d f v y g g t k t e a a n - h l g g g k k l e a v a r v d y k y s p k l n f s a f y s y v n l d  
Cam12/0231 v g a d f v y g g t k t e a a s - h l g g g k k l e a v a r v d y k y s p k l n f s a f y s y v n l d  
Cam12/0146 v g a d f v y g g t k t e a a n - h l g g g k k l e a v a r v d y k y s p k l n f s a f y s y v n l d  
Cam12/0152 v g a d f v y g g t k t e a a n - h l g g g k k l e a v a r v d y k y s p k l n f s a f y s y v n l d  
Cam12/0173 v g a d f v y g g t k t n i i g - q - - g g k k l e a v a r v d y k y s p k l n f s a f y s y v n v d  
Cam12/0197 v g a d f v y g g t k t e a a n - h l g g g k k l e a v a r v d y k y s p k l n f s a f y s y v n l a  
Cam12/0156 v g a d f v y g g t k t e a a n - h l g g g k k l e a v a r v d y k y s p k l n f s a f y s y v n l d  
Cam12/0190 v g a d f v y g g t k t e a a n - h l g g g k k l e a v a r v d y k y s p k l n f s a f y s y v n l d  
Cam12/0202 v g a d f v y g g t k t e a a n - h l g g g k k l e a v a r v d y k y s p k l n f s a f y s y v n l d  
Cam12/0222 v g a d f v y g g t k t e a a n h l g g g k k l e a v a r v d y k y s p k l n f s a f y s y v n l d  
Cam12/0183 v g a d f v y g g t k t e a a n - h l g g g k k l e a v a r v d y k y s p k l n f s a f y s y v n l d

52/P v g a d f v y g g t k t e - - - - n h s g g d k l e a v a r v d y k y s p k l n f s a f y s y v n v d  
70/P v g a d f v y g g t k t e - - - - n r s g g d k l e a v a r v d y k y s p k l n f s a f y s y v n v d  
K43/5 v g a d f v y g g t k t k - - - - n h s g g d k l e a v a r v d y k y s p k l n f s a f y s y v n v d  
KC7 v g a d f v y g g t k t e - - - - n h s g g d k l e a v a r v d y k y s p k l n f s a f y s y v n v d  
MB3361 v g a d f v y g g t k t e s n t - y v g g g d k l e a v a r v s y k y s p k l n f s a w s y v n v d  
β15 L7 β16 β17
