# Supplementary material for: Nanobodies targeting conserved epitopes on the major outer membrane protein of Campylobacter as potential tools for control of Campylobacter colonization
Source: PubMed Central journal article supplement (PMC5721652; doi:10.1186/s13567-017-0491-9), 2017-12-08
Supplement: 13567_2017_491_MOESM8_ESM.pdf [file 13567_2017_491_MOESM8_ESM.pdf]

**Sequence variability in L3 and L6 of MOMP encoding sequences of *C. jejuni* and *C. coli* strains.**

---

Loop 3

---

LNTIWTDNGIDGL<sup>1</sup>

F AV  
L D  
I T  
S

92.5%  
(620 of 670)

---

LNTIWTDNGIDGL<sup>2</sup>

MDSL SEDAY  
GI N YL  
V V  
F D

7.5%  
(50 of 670)

---

VGSIWTDDL----  
LNI NV----  
VGSIWTDDAI---

---

Loop 6

---

DKEKASTVVIEDQGNIGSLLAGEEIFYTTGSRLNGDTG<sup>3</sup>

K D VTLTTL LS Q N N I  
N N I VNAV G R K L  
H R ILI K I A  
F D G N  
T H Q F  
L E V  
S Q  
G  
Y  
N

81.5%  
(1827 of 2230)

---

DKEKASTVVIEDQGNIGSLLAGEEIFYTTGSRLNGDTG<sup>4</sup>

KEDQVTVTTLDNV SLDH AQ LN KR Q HDSQ  
NGL FNI KEK S T S D N TRNI  
A I A V Q F N K SVGL  
Y L G K Q H YCYV  
G A G E E S K  
I R E  
N A S  
Q R  
E

18.5%  
(403 of 2230)

---

KKDKLTFNTLEDVGNLD--LAGAEIFYTDGSNLNGDIG

N E S K V V V  
T L  
E

DKEKASTVVIEDQGNIGSLLAGEEIFYTTGSRLTGSRLNGDTG

K D VTLTT N N N N I

KKDKATITVIEDQGNIGSLLAGEEIFYTNGSKL-----NGGDTG

---

Sequence alignment was performed on the L3 and L6 loops of MOMP sequences obtained in this study, from the MLSTdb database and from NCBI. The L3 and L6 loops of MOMP in strain KC40 was utilized as consensus sequences.

<sup>1</sup>Loop 3 amino acid sequence of the MOMP of *C. jejuni* KC40 and the amino acid substitutions found in the other 27 *Campylobacter* isolates, analysed in this study, and in the sequences of the NCBI database at the same positions.

<sup>2</sup>Loop 3 amino acid sequence of the MOMP of *C. jejuni* KC40 and the amino acid substitutions found in the sequences in the NCBI database, which contain amino acid substitutions on different positions than found in the sequences of the MOMP of the 28 strains analysed in this study.

<sup>3</sup>Loop 6 amino acid sequence of the MOMP of *C. jejuni* KC40 and the amino acid substitutions found in the other 27 *Campylobacter* isolates, analysed in this study, and in the sequences of the MLSTdb database at the same positions.

<sup>4</sup>Loop 6 amino acid sequence of the MOMP of *C. jejuni* KC40 and the amino acid substitutions found in the sequences in the MLSTdb database, which contain amino acid substitutions on different positions than found in the sequences of the MOMP of the 28 strains analysed in this study.
